## CORRECTION

# Correction: Using financial incentives to promote physical activity in American Indian adolescents: A randomized controlled trial

Kevin R. Short, Jennifer Q. Chadwick, Tamela K. Cannady, Dannielle E. Branam, David F. Wharton, Mary A. Tullier, David M. Thompson, Kenneth C. Copeland

There is an error in the footnote of [Table 1](#). “Increase from baseline to end of Phase 1 within group,  $p < 0.03$ ” should be corrected to “Increase from baseline to end of Phase 1 within group,  $p < 0.05$ ”. Please see the correct [Table 1](#) here.

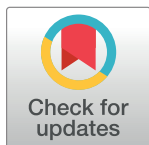

## OPEN ACCESS

**Citation:** Short KR, Chadwick JQ, Cannady TK, Branam DE, Wharton DF, Tullier MA, et al. (2020) Correction: Using financial incentives to promote physical activity in American Indian adolescents: A randomized controlled trial. PLoS ONE 15(3): e0231075. <https://doi.org/10.1371/journal.pone.0231075>

**Published:** March 25, 2020

**Copyright:** © 2020 Short et al. This is an open access article distributed under the terms of the [Creative Commons Attribution License](#), which permits unrestricted use, distribution, and reproduction in any medium, provided the original author and source are credited.

**Table 1. Clinical and physiological characteristics at baseline, changes at the end of Phase 1, and exercise performance in Phase 1.**

|                                          | Standard Group |                        | Incentive Group |                        |
|------------------------------------------|----------------|------------------------|-----------------|------------------------|
|                                          | Baseline       | Change at End of Phase | Baseline        | Change at End of Phase |
| BMI, kg/m <sup>2</sup> *                 | 34.9 ± 8.5     | 0.7 ± 1.1†             | 34.7 ± 6.2      | 0.7 ± 1.8†             |
| BMI, percentile                          | 98 ± 3         | 0 ± 1                  | 98 ± 3          | 0 ± 1                  |
| Body fat, %                              | 43.6 ± 8.1     | 0.9 ± 2.7              | 43.1 ± 6.9      | 0.1 ± 4.2              |
| Fat-free mass, kg                        | 48.6 ± 10.2    | 0.6 ± 2.9              | 52.2 ± 10.2     | 0.9 ± 4.3              |
| Waist circumference, cm                  | 104 ± 16       | -1 ± 5                 | 108 ± 12        | 0 ± 8                  |
| VO <sub>2</sub> peak, ml/kg FFM/min*     | 34.2 ± 7.1     | 3.4 ± 5.7†             | 35.2 ± 8.7      | 3.7 ± 7.5†             |
| Steps per day                            | 6,404 ± 3,425  | -869 ± 2,318           | 6,218 ± 2,419   | 483 ± 3,401            |
| Glucose, mmol/l                          | 5.3 ± 0.5      | 0.2 ± 1.0              | 5.1 ± 0.4       | 0.4 ± 2.1              |
| Insulin, pmol/l                          | 164.7 ± 229.3  | -2.9 ± 166.9           | 119.7 ± 94.3    | -11.4 ± 80.3           |
| iHOMA2 (%S)                              | 74.9 ± 48.5    | -13.8 ± 40.7           | 68.6 ± 44.2     | -4.9 ± 26.2            |
| HbA1c (%)                                | 5.4 ± 0.3      | 0.1 ± 0.2†             | 5.3 ± 0.2       | 0.1 ± 0.6              |
| Exercise sessions performed              | —              | 26 ± 16                | —               | 28 ± 15                |
| Total MVPA time, h                       | —              | 15.2 ± 10.1            | —               | 15.0 ± 8.1             |
| MVPA time per exercise session, minutes  | —              | 35 ± 7                 | —               | 32 ± 8                 |
| MVPA time in moderate intensity range, % | —              | 63 ± 18                | —               | 64 ± 18                |
| Payments for exercise, USD\$             | —              | 99 ± 58                | —               | 245 ± 144§             |

Values shown as mean ± SD. BMI, body mass index; VO<sub>2</sub>peak, peak oxygen uptake during aerobic fitness test; FFM, fat-free mass; iHOMA2, integrated homeostatic model of assessment; HbA1c, hemoglobin A1c; MVPA, moderate-to-vigorous activity. The Standard group had 18 girls, 17 boys; mean age 14.2 ± 2.4 years at baseline. The Incentive group had 25 girls, 17 boys; mean age 14.4 ± 2.3 years at baseline.

\* Main effect of time for entire cohort,  $p < 0.01$ .

† Increase from baseline to end of Phase 1 within group,  $p < 0.05$ .

§ Difference between groups,  $p < 0.01$ .

<https://doi.org/10.1371/journal.pone.0231075.t001>

## Reference

1. Short KR, Chadwick JQ, Cannady TK, Branam DE, Wharton DF, Tullier MA, et al. (2018) Using financial incentives to promote physical activity in American Indian adolescents: A randomized controlled trial. PLoS ONE 13(6): e0198390. <https://doi.org/10.1371/journal.pone.0198390> PMID: 29856832
